# Supplementary material
Source: HighWire-hosted journal article supplement (http://molpharm.aspetjournals.org/highwire/filestream/77309/field_highwire_adjunct_files/0/supplemental_figure_94623.pdf)
Supplement: supplemental_figure_94623.pdf [file supplemental_figure_94623.pdf]

# Multiple modes of RyR2 inhibition by flecainide

D. Mehra, M.S. Imtiaz, D.F. van Helden, B.C. Knollmann and D.R. Laver

Molecular Pharmacology

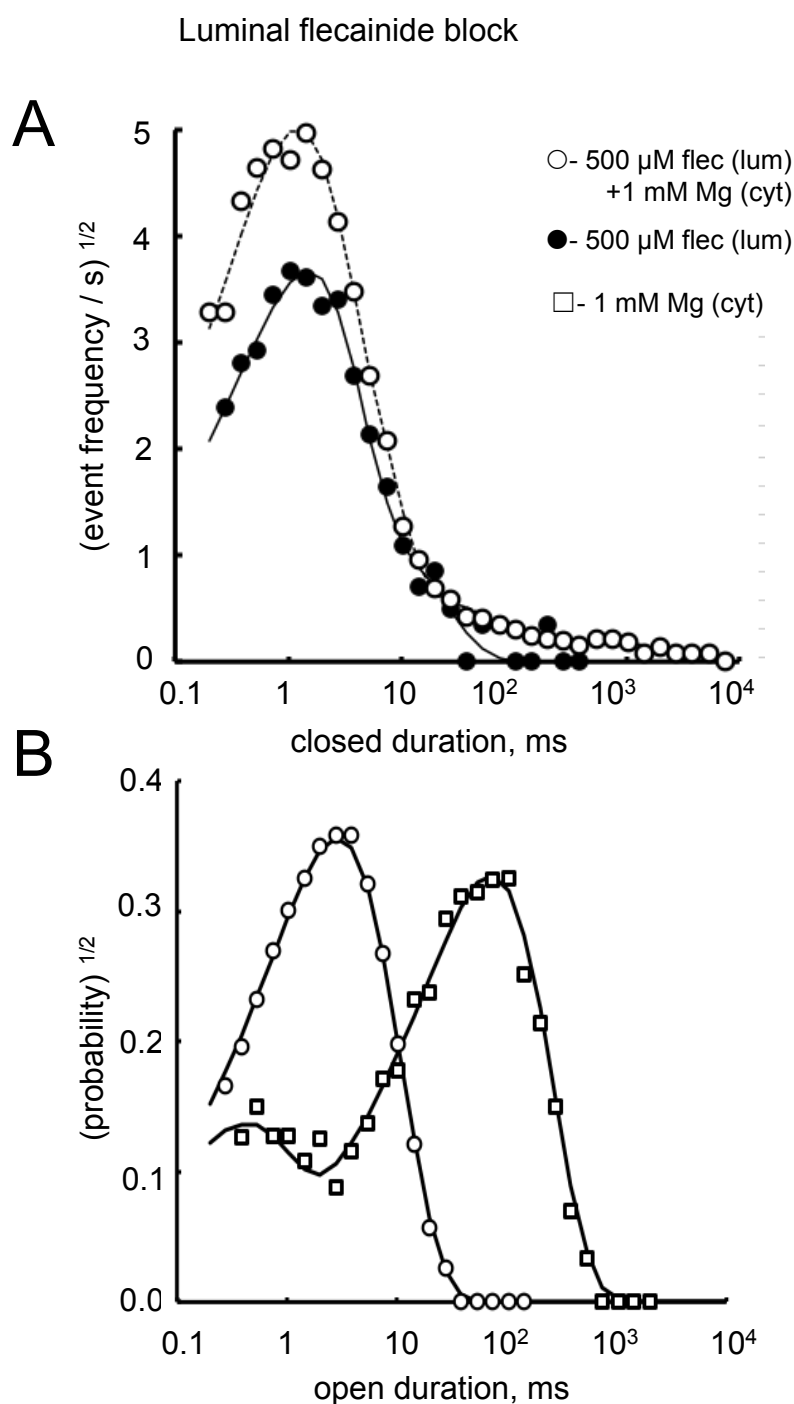

**Supplemental Figure. Dwell-time analysis of luminal flecainide inhibition. (A)** Closed dwell-time histograms showing the rate of closed events based on the method of Sigworth and Sine (1987) as described in the text. **(B)** Corresponding open dwell-time histograms. The legend applies to A and B.
